# Supplementary material for: NMR elucidation of the role of Mg2+ in the structure and stability of the conserved RNA motifs of the EMCV IRES element
Source: Royal Society of Chemistry journal article supplement (doi:10.1039/c3ob41840e), 2014-01-01
Supplement: c3ob41840e.pdf [file c3ob41840e.pdf]

## Supplementary Information

**SI Figure 1** NMR structure of the EMCV 16mer apo RNA shown as an ensemble of the 10 lowest energy and RMSD (Å) structures **(A)**, and the final NMR structure **(B)**. The four residues of the G<sub>547</sub>CGA<sub>550</sub> tetraloop are labelled. **(C)** Conformation of the G<sub>547</sub>CGA<sub>550</sub> tetraloop motif of the 16mer RNA, with the flanking stem G<sub>546</sub>.C<sub>551</sub> base pair drawn from the NMR structure and **(D)** scheme showing the hydrogen bonding and internucleotide base-phosphate, sugar-phosphate, and base-sugar interactions (dotted lines) which are  $\leq 3.5$  Å. Other representations are as follows: black circles, sugar moiety; blue circles, phosphate group; black box, base; red filled box, base stacking; solid lines, glycosidic and phosphodiester bonds.

**SI Figure 2** NMR structure of the EMCV 17mer apo RNA shown as an ensemble of the 10 lowest energy and RMSD (Å) structures **(A)**, and the final NMR structure **(B)**. The residues of the heptaloop motif (A607-A613) are labelled. **(C)** Conformation of the heptaloop motif of the 17mer RNA, with the flanking stem C<sub>606</sub>.G<sub>614</sub> base-pair drawn from the NMR structure and **(D)** scheme showing the hydrogen bonding and internucleotide base-phosphate, sugar-phosphate, and base-sugar interactions (dotted lines) which are  $\leq 3.5$  Å. Other representations are as follows: black circles, sugar moiety; blue circles, phosphate group; black box, base; red filled box, base stacking; solid lines, glycosidic and phosphodiester bonds. There is no red filled box between residues 5'C and 1A as no base stacking was observed.

**SI Figure3** 400 MHz <sup>1</sup>H- NMR titration (imino proton region) of the 17mer RNA (0.53mM) with Mg<sup>2+</sup> (molar equivalents), dissolved in 90% <sup>1</sup>H<sub>2</sub>O and 10% <sup>2</sup>H<sub>2</sub>O containing 20 mM PO<sub>4</sub><sup>3-</sup> (pH 6.2) and 20 mM NaCl at 5°C.

**SI Table 1** <sup>1</sup>H, <sup>13</sup>C and <sup>31</sup>P Chemical shift table (ppm) of the EMCV **(A)** 16mer apo RNA, **(B)** 16mer RNA/Mg<sup>2+</sup> complex, **(C)** 17mer apo RNA and **(D)** 17mer RNA/Mg<sup>2+</sup> complex. The exchangeable and non-exchangeable proton resonances were measured at 2°C and 25°C, respectively. Hydrogen bonded amino protons are denoted with an asterisk \*.

**SI Table 2A.** Local base-pair, base-pair helical and base-pair step parameters for the 16mer RNA. The usual range observed for A-form helices is also given for each parameter. Angles ( $^{\circ}$ ) are represented to 1dp and distances ( $\text{\AA}$ ) to 2dp.

**SI Table 2B.** Local base-pair, base-pair helical and base-pair step parameters for the 16mer  $\text{Mg}^{2+}$  RNA. Angles ( $^{\circ}$ ) are represented to 1dp and distances ( $\text{\AA}$ ) to 2dp. The usual range observed for A-form helices is also given for each parameter. Values highlighted in yellow and cyan indicate a change towards and away from A-form conformation when compared with the apo 16mer RNA.

**SI Table 2C.** Local base-pair, base-pair helical and base-pair step parameters for the 17mer RNA. Angles ( $^{\circ}$ ) are represented to 1dp and distances ( $\text{\AA}$ ) to 2dp. The usual range observed for A-form helices is also given for each parameter.

**SI Table 2D.** Local base-pair, base-pair helical and base-pair step parameters for the 17mer  $\text{Mg}^{2+}$  RNA. Angles ( $^{\circ}$ ) are represented to 1dp and distances ( $\text{\AA}$ ) to 2dp. The usual range observed for A-form helices is also given for each parameter. Values highlighted in yellow and cyan indicate a change towards and away from A-form conformation when compared with the apo 17mer RNA.

### Supplementary Information Figure 1

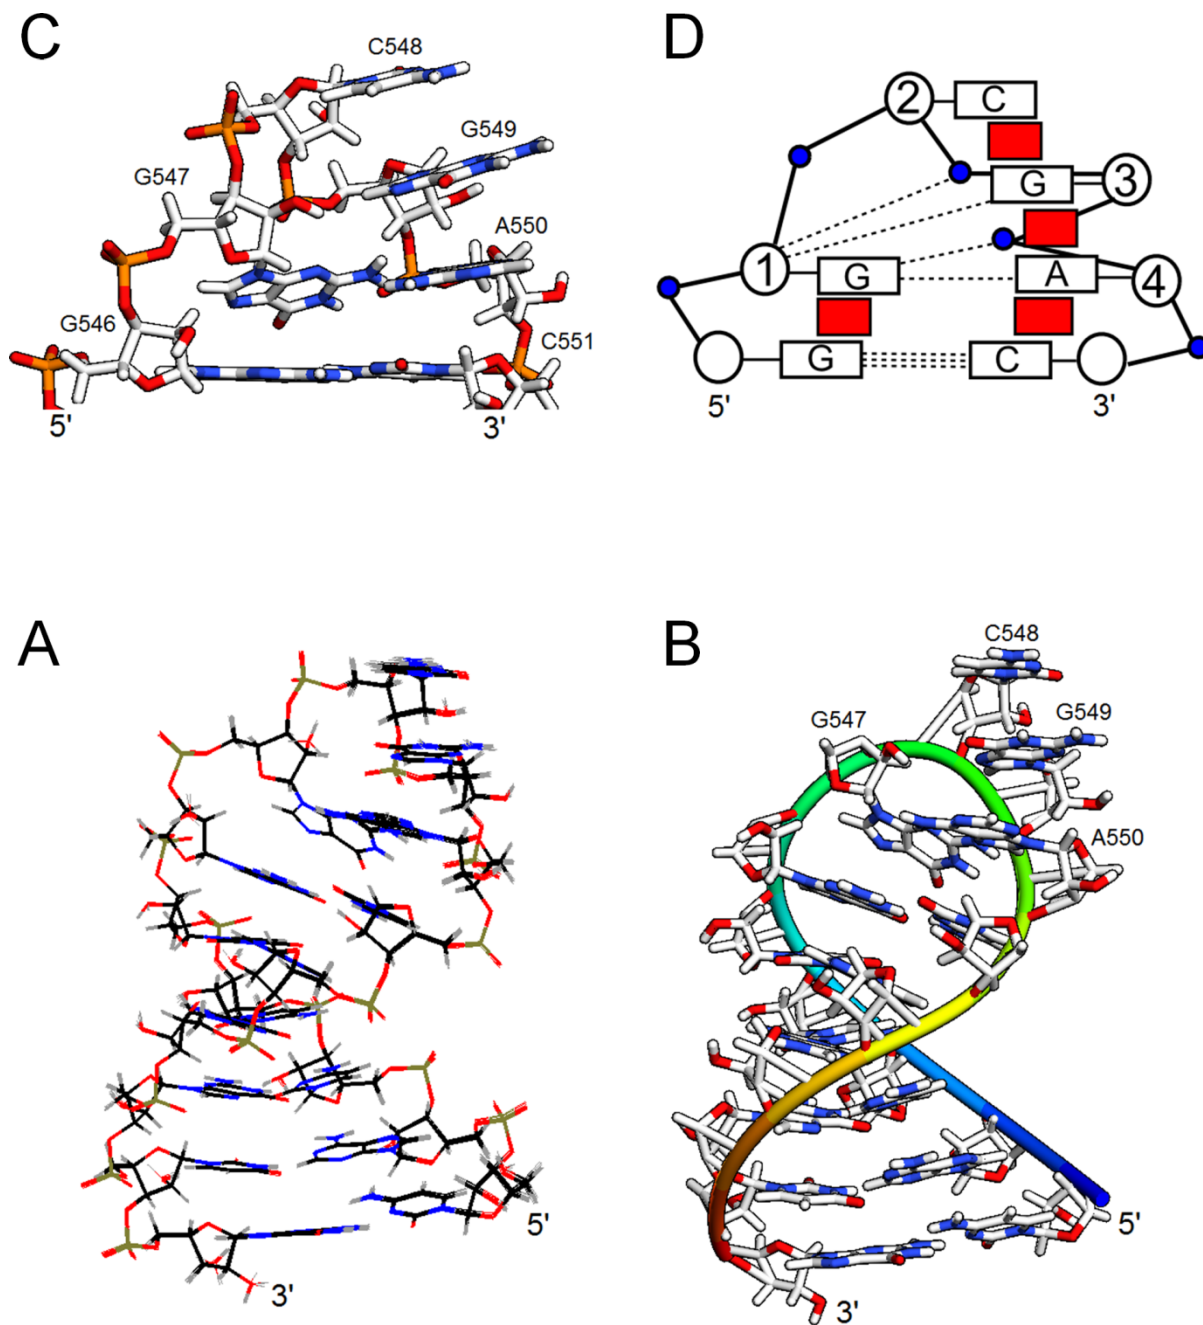

## Supplementary Information Figure 2

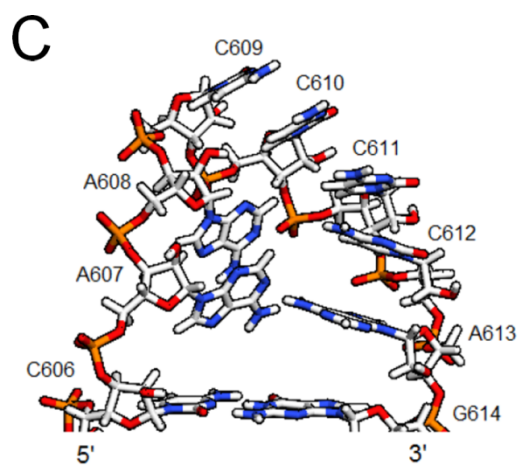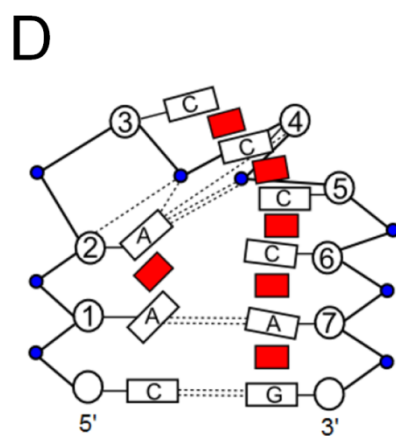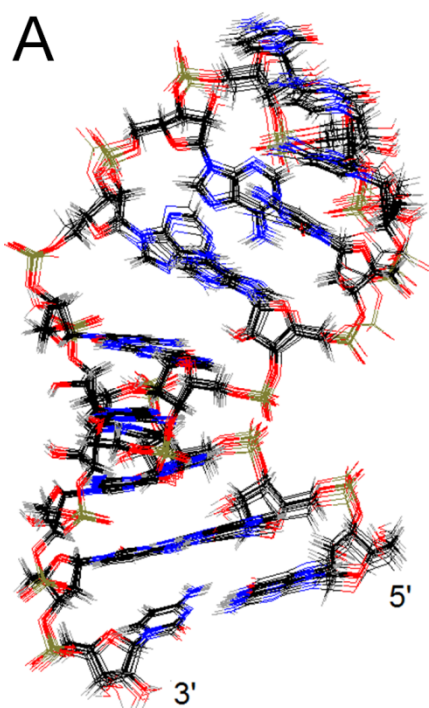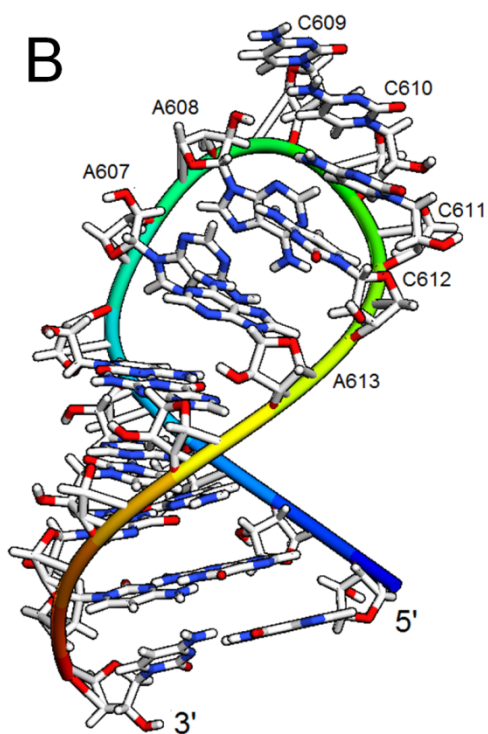

### Supplementary Information Figure 3

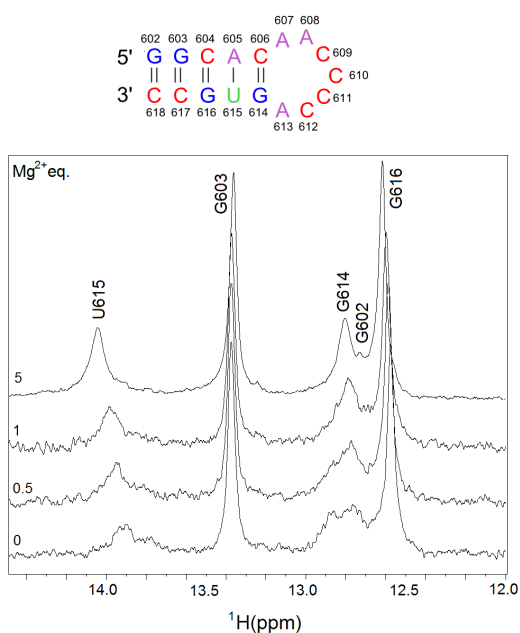

### Supplementary Information Table 1A.

| Residue | NH    | NH <sub>2</sub> | NH <sub>2</sub> ' | H2   | H5   | H6   | H8   | H1'  | H2'  | H3'  | H4'  | H5'  | H5'' | C2    | C5    | C6    | C8    | C1'  | C2'  | C3'  | C4'  | C5'  | <sup>31</sup> P |
|---------|-------|-----------------|-------------------|------|------|------|------|------|------|------|------|------|------|-------|-------|-------|-------|------|------|------|------|------|-----------------|
| C 541   |       | 7.26            | 8.50              |      | 6.07 | 8.17 |      | 5.56 | 4.56 | 4.64 | 4.38 | 3.99 | 4.10 |       | 98.9  | 143.0 |       | 93.7 | 75.5 | 73.5 | 84.4 | 61.9 | -               |
| A 542   |       | 6.62            | 8.11              | 7.69 |      |      | 8.35 | 6.05 | 4.63 | 4.85 | -    | -    | -    | 153.7 |       |       | 139.8 | 92.6 | 75.8 | 73.4 | -    | -    | -               |
| C 543   |       | 7.08            | 8.53              |      | 5.36 | 7.66 |      | 5.50 | 4.29 | -    | -    | -    | -    |       | 97.3  | 140.8 |       | 93.7 | 75.7 | -    | -    | -    | -               |
| C 544   |       | 7.00            | 8.52              |      | 5.52 | 7.80 |      | 5.52 | 4.34 | -    | -    | -    | -    |       | 97.8  | 141.3 |       | 94.2 | 75.6 | -    | -    | -    | -               |
| U 545   | 13.59 |                 |                   |      | 5.44 | 7.93 |      | 5.54 | 4.44 | 4.66 | -    | -    | -    |       | 103.7 | 141.6 |       | 94.2 | 75.2 | 72.0 | -    | -    | -               |
| G 546   | 12.27 | 5.82            | 8.16              |      |      |      | 7.72 | 5.89 | 4.53 | -    | -    | -    | -    |       |       |       | 136.2 | 92.4 | 75.8 | -    | -    | -    | 1.35            |
| G 547   | 10.46 | -               | -                 |      |      |      | 7.09 | 5.53 | 4.50 | 4.42 | -    | -    | -    |       |       |       | 135.8 | 93.6 | 73.8 | 72.4 | -    | -    | 4.22            |
| C 548   |       | -               | -                 |      | 5.44 | 7.70 |      | 5.39 | 4.42 | 4.07 | -    | 3.80 | 4.21 |       | 97.5  | 142.6 |       | 93.3 | 75.8 | 72.3 | -    | 64.0 | 2.88            |
| G 549   | 10.54 | -               | -                 |      |      |      | 7.65 | 5.44 | 4.35 | 4.28 | -    | -    | -    |       |       |       | 137.1 | 92.5 | -    | -    | -    | -    | -0.85           |
| A 550   |       | -               | -                 | 8.27 |      |      | 8.15 | 6.11 | 4.47 | 4.86 | 4.15 | -    | -    | 155.6 |       |       | 139.9 | 91.7 | 76.8 | 72.9 | 82.6 | -    | 2.86            |
| C 551   |       | 7.02            | 8.61              |      | 6.06 | 7.89 |      | 3.83 | 4.41 | 4.16 | -    | -    | -    |       | 99.7  | 141.6 |       | 95.2 | 74.4 | 72.3 | -    | -    | -               |
| A 552   |       | 6.45            | 7.72              | 7.04 |      |      | 8.09 | 5.96 | 4.67 | 4.78 | -    | -    | -    | 152.2 |       |       | 139.9 | 92.6 | 75.9 | 72.2 | -    | -    | -               |
| G 553   | 12.99 | 6.05            | 8.32              |      |      |      | 7.17 | 5.58 | 4.52 | 4.45 | -    | -    | -    |       |       |       | 135.7 | 93.7 | 75.5 | 72.9 | -    | -    | -               |
| G 554   | 13.31 | 6.07            | -                 |      |      |      | 7.16 | 5.70 | 4.47 | -    | -    | -    | -    |       |       |       | 135.8 | 93.2 | 75.4 | -    | -    | -    | -               |
| U 555   | 14.10 | -               | -                 |      | 5.11 | 7.65 |      | 5.57 | 4.42 | -    | -    | -    | -    |       | 103.2 | 140.8 |       | 92.5 | 75.5 | -    | -    | -    | -               |
| G 556   | 12.78 | -               | -                 |      |      |      | 7.74 | 5.95 | 4.09 | 4.34 | 4.27 | -    | -    |       |       |       | 136.3 | 91.0 | 78.0 | 70.6 | 84.0 | -    | -               |

### Supplementary Information Table 1B.

| Residue | NH    | NH <sub>2</sub> | NH <sub>2</sub> ' | H2   | H5   | H6   | H8   | H1'  | H2'  | H3'  | H4'  | H5'  | H5'' | C2    | C5    | C6    | C8    | C1'  | C2'  | C3'  | C4'  | C5'  | <sup>31</sup> P |
|---------|-------|-----------------|-------------------|------|------|------|------|------|------|------|------|------|------|-------|-------|-------|-------|------|------|------|------|------|-----------------|
| C 541   |       | 7.04            | 8.49              |      | 6.04 | 8.14 |      | 5.51 | 4.55 | 4.64 | 4.38 | 3.97 | 4.08 |       | 98.7  | 143.1 |       | 94.1 | 75.4 | 73.5 | 84.3 | 61.9 | -0.45           |
| A 542   |       | 6.50            | 8.02              | 7.67 |      |      | 8.36 | 6.06 | 4.61 | 4.87 | -    | -    | -    | 153.8 |       |       | 140.1 | 92.8 | 75.7 | 72.9 | -    | -    | 0.09            |
| C 543   |       | 7.03            | 8.41              |      | 5.35 | 7.71 |      | 5.51 | 4.27 | -    | -    | -    | -    |       | 97.2  | 141.1 |       | 94.1 | 75.7 | -    | -    | -    | -0.36           |
| C 544   |       | 6.93            | 8.47              |      | 5.51 | 7.85 |      | 5.53 | 4.35 | -    | -    | -    | -    |       | 97.6  | 141.5 |       | 93.6 | 75.4 | -    | -    | -    | -0.32           |
| U 545   | 13.64 |                 |                   |      | 5.46 | 7.94 |      | 5.54 | 4.44 | 4.66 | -    | -    | -    |       | 103.6 | 141.5 |       | 93.5 | 75.4 | 71.9 | -    | -    | 0.57            |
| G 546   | 12.33 | 5.91            | 8.13              |      |      |      | 7.77 | 5.91 | 4.49 | -    | -    | -    | -    |       |       |       | 136.4 | 92.2 | 75.8 | -    | -    | -    | 1.16            |
| G 547   | 10.66 | -               | -                 |      |      |      | 7.20 | 5.77 | 4.27 | 4.31 | -    | -    | -    |       |       |       | 136.6 | 93.9 | -    | -    | -    | -    | 4.40            |
| C 548   |       | 6.98            | 8.44              |      | 5.47 | 7.69 |      | 5.38 | 4.45 | 4.08 | -    | 3.80 | 4.24 |       | 97.4  | 142.7 |       | 93.4 | 75.7 | 72.0 | -    | 63.8 | 3.01            |
| G 549   | -     | -               | -                 |      |      |      | 7.64 | 5.47 | 4.29 | 4.27 | -    | -    | -    |       |       |       | 137.0 | 92.5 | -    | -    | -    | -    | -1.10           |
| A 550   |       | -               | -                 | 8.28 |      |      | 8.08 | 6.14 | 4.45 | 4.85 | 4.16 | -    | -    | 155.9 |       |       | 139.8 | 91.8 | 76.8 | 72.8 | 82.4 | -    | 2.87            |
| C 551   |       | 7.05            | 8.66              |      | 6.07 | 7.97 |      | 3.90 | 4.42 | 4.16 | -    | -    | -    |       | 99.9  | 141.7 |       | 95.3 | 74.3 | 74.6 | -    | -    | -               |
| A 552   |       | 6.39            | 7.76              | 7.04 |      |      | 8.13 | 5.96 | 4.65 | 4.79 | -    | -    | -    | 152.5 |       |       | 139.6 | 92.5 | 75.8 | 72.9 | -    | -    | -               |
| G 553   | 13.00 | 6.17            | 8.36              |      |      |      | 7.24 | 5.63 | 4.52 | 4.47 | -    | -    | -    |       |       |       | 135.7 | 92.2 | 75.5 | -    | -    | -    | 0.21            |
| G 554   | 13.33 | 6.11            | -                 |      |      |      | 7.15 | 5.70 | 4.47 | -    | -    | -    | -    |       |       |       | 136.0 | 93.1 | 75.3 | -    | -    | -    | -0.41           |
| U 555   | 14.16 | -               | -                 |      | 5.12 | 7.64 |      | 5.56 | 4.42 | -    | -    | -    | -    |       | 103.1 | 141.0 |       | 93.7 | 75.7 | -    | -    | -    | 0.60            |
| G 556   | 12.64 | -               | -                 |      |      |      | 7.74 | 5.95 | 4.09 | 4.35 | 4.27 | -    | -    |       |       |       | 137.6 | 91.2 | 78.0 | 70.5 | 83.9 | -    | 0.19            |

### Supplementary Information Table 1C.

| Residue | NH    | NH <sub>2</sub> | NH <sub>2</sub> ' | H2   | H5   | H6   | H8   | H1'  | H2'  | H3'  | H4'  | H5'  | H5'' | C2    | C5    | C6    | C8    | C1'  | C2'  | C3'  | C4'  | C5'  | <sup>31</sup> P |       |
|---------|-------|-----------------|-------------------|------|------|------|------|------|------|------|------|------|------|-------|-------|-------|-------|------|------|------|------|------|-----------------|-------|
| G 602   | 12.92 | -               | -                 |      |      |      | 8.07 | 5.79 | 4.93 | 4.63 | 4.42 | 4.06 | 3.96 |       |       |       | 138.8 | 92.6 | 75.1 | 74.4 | 84.7 | 62.8 | -4.15           |       |
| G 603   | 13.41 | 5.73            | -                 |      |      |      | 7.65 | 5.91 | 4.54 | 4.66 | 4.58 | 4.22 | -    |       |       |       | 136.6 | 92.9 | 75.4 | 72.7 | -    | 65.3 | -4.51           |       |
| C 604   |       | 6.99            | 8.54              |      | 5.31 | 7.72 |      | 5.51 | 4.53 | 4.57 | 4.45 | 4.14 | -    |       | 97.5  | 140.7 |       | 93.7 | 75.4 | 72.2 | 81.7 | 64.5 | -4.21           |       |
| A 605   |       | 6.33            | 8.03              | 7.32 |      |      | 8.02 | 5.93 | 4.51 | 4.62 | 4.49 | 4.15 | -    | 153.0 |       |       | 139.3 | 93.2 | 75.6 | 73.0 | 81.9 | 65.3 | -4.45           |       |
| C 606   |       | 6.52            | 8.24              |      | 5.03 | 7.31 |      | 5.31 | 4.35 | 4.39 | 4.45 | 4.08 | -    |       |       | 97.3  | 140.2 |      | 93.7 | 75.7 | 73.2 | 81.9 | 65.0            | -     |
| A 607   |       | -               | -                 | 7.83 |      |      | 8.36 | 6.13 | -    | -    | -    | -    | -    | 154.1 |       |       | -     | 91.6 | -    | -    | -    | -    | -               | -     |
| A 608   |       | -               | -                 | 7.83 |      |      | 8.15 | 5.71 | -    | 4.62 | -    | -    | -    | 154.1 |       |       | -     | 93.4 | -    | 72.7 | -    | -    | -               | -4.64 |
| C 609   |       | -               | -                 |      | 5.41 | 7.53 |      | 5.56 | 4.07 | 4.41 | 4.31 | 3.92 | -    |       | 97.5  | 141.8 |       | 93.2 | 76.0 | 74.1 | 83.2 | 65.0 | -4.57           |       |
| C 610   |       | -               | -                 |      | 5.73 | 7.86 |      | 5.59 | 4.38 | 4.31 | 4.45 | -    | -    |       | 98.9  | 143.2 |       | 93.5 | 76.0 | 73.2 | 81.7 | -    | -4.34           |       |
| C 611   |       | -               | -                 |      | 5.61 | 7.76 |      | 5.72 | 4.42 | 4.42 | -    | -    | -    |       | 98.4  | 141.6 |       | 93.1 | 76.0 | 73.0 | -    | -    | -               |       |
| C 612   |       | -               | -                 |      | 5.73 | 7.87 |      | 5.66 | 4.48 | 4.54 | 4.38 | -    | -    |       | 98.1  | 141.6 |       | 93.1 | 73.5 | 73.5 | 82.0 | -    | -               |       |
| A 613   |       | -               | -                 | 8.11 |      |      | 8.22 | 5.99 | 4.86 | 4.61 | -    | 4.36 | 4.27 | 154.1 |       |       | 141.3 | 92.3 | 75.7 | 72.9 | -    | 68.0 | -               |       |
| G 614   | 12.76 | -               | -                 |      |      |      | 7.95 | 6.13 | 4.58 | -    | -    | -    | -    |       |       |       | 140.8 | 91.6 | -    | -    | -    | -    | -4.81           |       |
| U 615   | 13.92 |                 |                   |      | 5.16 | 7.83 |      | 5.55 | 4.59 | 4.51 | 4.47 | 4.14 | -    |       | 103.0 | 141.5 |       | 93.5 | 75.1 | 73.2 | 81.9 | -    | -4.20           |       |
| G 616   | 12.58 | 5.95            | 8.12              |      |      |      | 7.72 | 5.80 | 4.49 | 4.59 | -    | 4.14 | 4.05 |       |       |       | 136.1 | 92.6 | 75.4 | -    | -    | 64.5 | -4.71           |       |
| C 617   |       | 7.01            | 8.57              |      | 5.24 | 7.67 |      | 5.47 | 4.23 | 4.42 | 4.39 | -    | -    |       | 97.0  | 141.0 |       | 94.0 | 75.7 | 72.1 | 83.3 | -    | -4.45           |       |
| C 618   |       | 7.07            | 8.49              |      | 5.51 | 7.67 |      | 5.75 | 4.01 | 4.17 | 4.15 | -    | -    |       | 98.4  | 141.6 |       | 92.9 | 77.6 | 69.7 | 83.3 | -    | -               |       |

### Supplementary Information Table 1D.

| Residue | NH    | NH <sub>2</sub> | NH <sub>2</sub> ' | H2   | H5   | H6   | H8   | H1'  | H2'  | H3'  | H4'  | H5'  | H5'' |
|---------|-------|-----------------|-------------------|------|------|------|------|------|------|------|------|------|------|
| G 602   | 12.75 | -               | -                 |      |      |      | 8.07 | 5.79 | 4.92 | 4.65 | 4.42 | 4.08 | 3.96 |
| G 603   | 13.41 | 5.71            | -                 |      |      |      | 7.68 | 5.91 | 4.55 | 4.69 | 4.59 | 4.22 | -    |
| C 604   |       | 6.89            | 8.55              |      | 5.32 | 7.76 |      | 5.53 | 4.54 | 4.59 | 4.46 | 4.14 | -    |
| A 605   |       | 6.30            | 8.04              | 7.32 |      |      | 8.03 | 5.93 | 4.49 | 4.64 | 4.49 | 4.16 | -    |
| C 606   |       | 6.62            | 8.16              |      | 5.02 | 7.38 |      | 5.33 | 4.31 | 4.39 | -    | 4.09 | -    |
| A 607   |       | -               | -                 | 7.84 |      |      | 8.36 | 6.13 | 4.90 | -    | -    | -    | -    |
| A 608   |       | -               | -                 | 7.84 |      |      | 8.17 | 5.76 | 4.73 | 4.65 | -    | -    | -    |
| C 609   |       | -               | -                 |      | 5.41 | 7.55 |      | 5.55 | 4.07 | 4.41 | 4.32 | 3.92 | -    |
| C 610   |       | -               | -                 |      | 5.71 | 7.87 |      | 5.58 | 4.39 | 4.30 | -    | -    | 3.94 |
| C 611   |       | -               | -                 |      | 5.57 | 7.77 |      | 5.69 | 4.46 | 4.43 | -    | -    | -    |
| C 612   |       | -               | -                 |      | 5.69 | 7.87 |      | 5.66 | 4.47 | 4.55 | -    | -    | -    |
| A 613   |       | -               | -                 | 8.11 |      |      | 8.21 | 5.98 | 4.87 | 4.61 | -    | 4.38 | 4.29 |
| G 614   | 12.84 | -               | -                 |      |      |      | 8.09 | 6.15 | 4.56 | -    | -    | -    | -    |
| U 615   | 14.10 |                 |                   |      | 5.18 | 7.87 |      | 5.55 | 4.58 | 4.54 | -    | 4.15 | -    |
| G 616   | 12.64 | 5.93            | 8.05              |      |      |      | 7.72 | 5.81 | 4.48 | 4.61 | -    | 4.14 | -    |
| C 617   |       | 6.84            | 8.53              |      | 5.25 | 7.69 |      | 5.48 | 4.24 | 4.40 | -    | -    | -    |
| C 618   |       | 7.04            | 8.47              |      | 5.52 | 7.67 |      | 5.75 | 4.01 | 4.17 | -    | -    | -    |

Supplementary Information Table 2A

| Base-pair | dx             | dy           | Inclin. ( $\eta$ ) | Tip ( $q$ ) | h-Rise (h)  | h-Twist ( $\Omega_h$ ) |
|-----------|----------------|--------------|--------------------|-------------|-------------|------------------------|
|           | -5.39<dx<-2.95 | 0.88<dy<0.90 | 7.4< $\eta$ <22    | 28.7<q<36.3 | 2.47<h<3.19 | 28.7< $\Omega_h$ <36.3 |
| CG/AU     | -3.92          | -0.51        | 12.6               | 2.1         | 2.71        | 30.3                   |
| AU/CG     | -3.48          | 0.63         | 5.7                | -3.0        | 3.17        | 31.9                   |
| CG/CG     | -3.58          | 0.87         | 14.9               | -5.2        | 2.47        | 29.4                   |
| CG/UA     | -4.49          | -0.45        | 21.1               | 2.6         | 3.01        | 34.7                   |
| UA/GC     | -4.61          | 0.07         | 19.6               | -1.2        | 2.56        | 30.6                   |
| GC/GA     | -2.12          | 2.70         | 14.5               | 5.2         | 2.43        | 58.4                   |

  

| Base-pair | Shift (Dx)    | Slide (Dy)     | Rise (Dz)    | Tilt ( $\tau$ )   | Roll ( $\rho$ )   | Twist ( $\omega$ )   |
|-----------|---------------|----------------|--------------|-------------------|-------------------|----------------------|
|           | -0.54<Dx<0.54 | -1.87<Dy<-1.19 | 3.12<Dz<3.52 | -2.7< $\tau$ <2.9 | 4.1< $\rho$ <11.9 | 27.4< $\omega$ <34.8 |
| CG/AU     | 0.17          | -1.43          | 3.09         | -1.1              | 6.5               | 29.6                 |
| AU/CG     | -0.18         | -1.60          | 3.35         | 1.7               | 3.1               | 31.7                 |
| CG/CG     | -0.21         | -1.14          | 2.88         | 2.6               | 7.5               | 28.3                 |
| CG/UA     | 0.12          | -1.47          | 3.75         | -1.5              | 12.3              | 32.5                 |
| UA/GC     | 0.02          | -1.47          | 3.21         | 0.6               | 10.2              | 28.9                 |
| GC/GA     | -2.84         | -1.50          | 2.61         | -5.1              | 14.0              | 56.6                 |

Supplementary Information Table 2B

| Base-pair | dx             | dy           | Inclin. ( $\eta$ ) | Tip ( $q$ ) | h-Rise (h)  | h-Twist ( $\Omega_h$ ) |
|-----------|----------------|--------------|--------------------|-------------|-------------|------------------------|
|           | -5.39<dx<-2.95 | 0.88<dy<0.90 | 7.4< $\eta$ <22    | 28.7<q<36.3 | 2.47<h<3.19 | 28.7< $\Omega_h$ <36.3 |
| CG/AU     | -3.96          | 0.60         | 18.5               | -20.9       | 3.36        | 38.7                   |
| AU/CG     | -3.20          | 0.65         | 3.8                | 1.9         | 2.61        | 30.2                   |
| CG/CG     | -6.05          | -0.45        | 27.6               | 8.4         | 2.40        | 32.0                   |
| CG/UA     | -3.79          | -0.44        | 8.1                | 1.2         | 3.02        | 31.4                   |
| UA/GC     | -4.19          | 0.68         | 19.3               | -0.3        | 2.74        | 34.4                   |
| GC/GA     | -2.66          | 5.18         | 2.6                | -7.0        | 2.41        | 56.6                   |

  

| Base-pair | Shift (Dx)    | Slide (Dy)     | Rise (Dz)    | Tilt ( $\tau$ )   | Roll ( $\rho$ )   | Twist ( $\omega$ )   |
|-----------|---------------|----------------|--------------|-------------------|-------------------|----------------------|
|           | -0.54<Dx<0.54 | -1.87<Dy<-1.19 | 3.12<Dz<3.52 | -2.7< $\tau$ <2.9 | 4.1< $\rho$ <11.9 | 27.4< $\omega$ <34.8 |
| CG/AU     | 0.89          | -1.48          | 3.91         | 13.4              | 11.8              | 34.5                 |
| AU/CG     | -0.42         | -1.49          | 2.70         | -1.0              | 2.00              | 30.1                 |
| CG/CG     | -0.19         | -1.90          | 3.65         | -4.5              | 14.6              | 28.2                 |
| CG/UA     | 0.17          | -1.62          | 3.27         | -0.7              | 4.4               | 31.1                 |
| UA/GC     | -0.38         | -1.48          | 3.39         | 0.2               | 11.2              | 32.6                 |
| GC/GA     | -4.61         | -2.41          | 3.02         | 6.6               | 2.5               | 56.2                 |

Supplementary Information Table 2C.

| Base-pair | dx             | dy           | Inclin. ( $\eta$ ) | Tip (q)     | h-Rise (h)  | h-Twist ( $\Omega_h$ ) |
|-----------|----------------|--------------|--------------------|-------------|-------------|------------------------|
|           | -5.39<dx<-2.95 | 0.88<dy<0.90 | 7.4< $\eta$ <22    | 28.7<q<36.3 | 2.47<h<3.19 | 28.7< $\Omega_h$ <36.3 |
| GG/CC     | -5.76          | -0.68        | 37.3               | -0.3        | 1.81        | 33.8                   |
| GC/GC     | -2.53          | 0.65         | 0.4                | -0.0        | 3.67        | 32.1                   |
| CA/UG     | -6.04          | -0.10        | 35.4               | 3.9         | 1.63        | 31.8                   |
| AC/GU     | -2.68          | -0.97        | -2.2               | 0.9         | 4.38        | 30.9                   |

  

| Base-pair | Shift (Dx)    | Slide (Dy)     | Rise (Dz)    | Tilt ( $\tau$ )   | Roll ( $\rho$ )   | Twist ( $\omega$ )   |
|-----------|---------------|----------------|--------------|-------------------|-------------------|----------------------|
|           | -0.54<Dx<0.54 | -1.87<Dy<-1.19 | 3.12<Dz<3.52 | -2.7< $\tau$ <2.9 | 4.1< $\rho$ <11.9 | 27.4< $\omega$ <34.8 |
| GG/CC     | 0.41          | -1.64          | 3.43         | 0.2               | 20.3              | 27.2                 |
| GC/GC     | -0.36         | -1.37          | 3.68         | 0.0               | 0.2               | 32.1                 |
| CA/UG     | -0.11         | -1.81          | 3.21         | -2.0              | 18.3              | 26.1                 |
| AC/GU     | 0.45          | -1.59          | 4.34         | -0.5              | -1.2              | 30.9                 |

Supplementary Information Table 2D.

| Base-pair | dx             | dy           | Inclin. ( $\eta$ ) | Tip (q)     | h-Rise (h)  | h-Twist ( $\Omega_h$ ) |
|-----------|----------------|--------------|--------------------|-------------|-------------|------------------------|
|           | -5.39<dx<-2.95 | 0.88<dy<0.90 | 7.4< $\eta$ <22    | 28.7<q<36.3 | 2.47<h<3.19 | 28.7< $\Omega_h$ <36.3 |
| GG/CC     | -5.39          | -0.15        | 32.9               | -3.1        | 1.91        | 34.7                   |
| GC/GC     | -4.86          | 0.42         | 7.6                | -0.3        | 3.14        | 29.1                   |
| CA/UG     | -5.58          | 0.04         | 27.3               | -0.3        | 2.28        | 32.0                   |
| AC/GU     | -3.67          | -0.70        | 2.5                | 0.5         | 3.82        | 28.8                   |
| CA/AG     | -2.76          | 1.21         | 6.5                | -0.3        | 5.93        | 46.0                   |

  

| Base-pair | Shift (Dx)    | Slide (Dy)     | Rise (Dz)    | Tilt ( $\tau$ )   | Roll ( $\rho$ )   | Twist ( $\omega$ )   |
|-----------|---------------|----------------|--------------|-------------------|-------------------|----------------------|
|           | -0.54<Dx<0.54 | -1.87<Dy<-1.19 | 3.12<Dz<3.52 | -2.7< $\tau$ <2.9 | 4.1< $\rho$ <11.9 | 27.4< $\omega$ <34.8 |
| GG/CC     | 0.23          | -1.74          | 3.31         | 1.8               | 18.67             | 29.4                 |
| GC/GC     | -0.19         | -2.02          | 3.42         | 0.2               | 3.8               | 28.8                 |
| CA/UG     | -0.01         | -1.74          | 3.41         | 0.2               | 14.6              | 28.6                 |
| AC/GU     | 0.32          | -1.66          | 3.90         | -0.2              | 1.2               | 28.8                 |
| CA/AG     | -0.92         | -1.52          | 6.13         | 0.2               | 5.1               | 45.7                 |
